1 **The polar localization hub protein PopZ restrains adaptor dependent ClpXP**  
2 **proteolysis in *Caulobacter crescentus***

3

4 Kamal Kishore Joshi and Peter Chien<sup>#</sup>

5

6 Department of Biochemistry and Molecular Biology,

7 Molecular and Cellular Biology Graduate Program,

8 University of Massachusetts Amherst, Amherst, MA 01003, USA

9

10 Running title: PopZ restrains ClpXP-mediated proteolysis

11

12 <sup>#</sup> Address correspondence to Peter Chien, [pchien@biochem.umass.edu](mailto:pchien@biochem.umass.edu)

13

14

15

16

17

18

19

20

21

22

23

24 **ABSTRACT**

25 In *Caulobacter crescentus*, timely degradation of several proteins by the ClpXP  
26 protease is critical for proper cell cycle progression. During the cell cycle, the  
27 ClpXP protease, the substrate CtrA and many other proteins are localized to the  
28 stalked pole dependent on a polar interaction hub composed of PopZ protein  
29 oligomers. Prior work suggests that the localization of ClpXP, protease  
30 substrates, and cofactors is needed for recognition of substrates such as CtrA by  
31 ClpXP. Here, we formally test this hypothesis by examining the role of PopZ in  
32 ClpXP activity and find surprisingly that CtrA degradation is enhanced in cells  
33 lacking polar localization due to loss of PopZ. The ClpXP adaptor CpdR is  
34 required for this enhanced degradation of CtrA and other adaptor-dependent  
35 substrates, but adaptor-independent substrate degradation is not affected upon  
36 loss of PopZ. We find that overexpression of PopZ also leads to faster  
37 degradation of CtrA, but is likely due to nonphysiologically relevant recognition of  
38 CtrA by ClpXP alone as loss of CpdR does not affect this enhancement. Our  
39 main conclusion is that loss of PopZ, and therefore loss of polar localization,  
40 does not result in the loss of ClpXP regulated proteolysis, as would be predicted  
41 from a model which requires polar localization of ClpXP for its activation. Rather,  
42 our data point to a model where PopZ normally restrains ClpXP proteolysis by  
43 promoting the inactivation of the CpdR adaptor, likely through the  
44 phosphorylation activity of the CckA kinase.

45

46

47 **IMPORTANCE**

48 Regulated proteolysis is critical for the cell cycle progression of bacteria such as  
49 *Caulobacter crescentus*. According to one model, this regulated proteolysis  
50 requires localization of the ClpXP protease at the stalked pole for its subsequent  
51 degradation of substrates such as CtrA. This study offers evidence that supports  
52 an alternative model to explain how localization might influence protein  
53 degradation. Using a delocalized *in vivo* system created by the deletion of a pole  
54 organizing protein PopZ, we show that activation of the ClpXP protease is  
55 independent of its polar localization. The data points to a role for PopZ in  
56 restraining ClpXP activity, likely by controlling the activity of upstream regulators  
57 of protease activity, such as CckA, though changes in its localization.

58

59 **INTRODUCTION**

60 Proteolysis plays an important role in facilitating cell cycle progression and  
61 various developmental transitions in bacteria. Examples are: cell cycle  
62 progression in *Caulobacter crescentus* (*Caulobacter* hereafter) and cellular  
63 transition from vegetative to sporulation stage in *Bacillus subtilis* (1-4). The cell  
64 cycle of *Caulobacter* starts with a replication incompetent motile swarmer cell  
65 (G1-like phase). In response to developmental cues, the swarmer (SW) cell  
66 differentiates into a stalked (ST) cell. The ST cell is capable of replication and  
67 division to give birth to a new SW cell. Following replication and asymmetric  
68 division the mother ST cell immediately starts DNA replication and another round  
69 of cell division whereas the new born SW cell again has to differentiate into ST

70 cell in order to continue its cell cycle (5, 6). To maintain such stringent control  
71 during SW-to-ST transition, levels of many proteins, including a protein called  
72 CtrA, change dramatically (3, 7).

73

74 CtrA is a transcriptional factor that controls transcription of ~95 genes and also  
75 functions as an inhibitor of DNA replication (8, 9). In SW cells, CtrA is  
76 phosphorylated by a membrane-bound bifunctional kinase CckA via the  
77 phosphotransferase ChpT (10-12). The phosphorylated CtrA binds tightly to DNA  
78 at chromosomal origin of replication (*oriC*) to block the initiation of replication (3,  
79 8, 12). The same CckA-ChpT kinase pathway also phosphorylates the ClpX  
80 adaptor and response regulator CpdR in the SW cell which functionally  
81 inactivates it (12-15). During the SW-to-ST transition, the same CckA-ChpT  
82 cascade dephosphorylates both CtrA and CpdR via shuttling of the phosphoryl  
83 groups back to CckA (16, 17). The dephosphorylated CpdR then drives  
84 localization of ClpXP protease to the stalk pole (13). In parallel with this, other  
85 cofactors, PopA and RcdA, were shown to localize CtrA to the same stalk pole  
86 (18, 19). This convergent localization of ClpXP protease and the CtrA substrate  
87 at the stalk pole was postulated to increase the local concentration of the  
88 protease and the substrate leading to the degradation of CtrA (19, 20). The  
89 destruction of CtrA then allows the assembly of replication machinery at *oriC*,  
90 which then initiates the replication process.

91

92 A pole organizing protein, called PopZ (Polar Organizing Protein-Z), was  
93 identified in recent years. PopZ functions as a scaffold to recruit the accessory  
94 factors and the protease complex involved in CtrA degradation at the stalked  
95 pole (21). Besides serving as a scaffold, PopZ also anchors sister chromosomes  
96 at the stalked pole by directly binding to ParB, which is associated with *oriC*  
97 during chromosome segregation (22, 23). It also mediates polar localization of  
98 proteins involved in cellular signaling including both the transmembrane histidine  
99 kinase CckA and the DivJ protein through SpmX binding (23, 24). It was  
100 proposed that PopZ functions as a switch between chromosome tethering and  
101 protein scaffolding during SW-to-ST transition in *Caulobacter* to accommodate  
102 programmed asymmetry during cell cycle (21). Further dissection of PopZ protein  
103 revealed an N-terminal region, which is sufficient for binding all its partner  
104 proteins, and a C-terminal region for homo-oligomerization (25). Together, these  
105 protein localization studies supported a model where spatial  
106 compartmentalization of the protease ClpXP and the substrate CtrA allows  
107 removal of CtrA during SW-to-ST transition in *Caulobacter*.

108

109 Studies that were conducted recently suggested that spatial localization might  
110 not be critical for CtrA degradation. The factor RcdA was shown necessary for  
111 CtrA degradation as deletion of this factor did not support cell cycle changes in  
112 CtrA degradation (18). Structure guided RcdA mutants that were incompetent to  
113 localize to the stalk pole also failed to localize CtrA, but this delocalization did not  
114 perturb cell cycle-dependent degradation of CtrA (26). Localization of ClpXP to

115 the stalk pole is not necessary for some of its activity as some ClpXP substrates,  
116 such as FtsZ, were still degraded in a SW cell where ClpXP was shown to be  
117 delocalized (27). Furthermore, *in vitro* reconstitution experiments using highly  
118 purified proteins supported an adaptor hierarchy model where CpdR, RcdA and  
119 PopA work in a coordinated fashion as adaptors to degrade many substrates  
120 including CtrA (4, 15).

121

122 In this study, we find that CtrA degradation is enhanced in PopZ lacking cells  
123 suggesting that PopZ restrains CtrA degradation. The ClpXP adaptor CpdR is  
124 required for this enhanced degradation as CtrA degradation was stabilized in a  
125  $\Delta cpdR \Delta popZ$  strain. This degradation enhancement in  $\Delta popZ$  cells also extends  
126 to additional CpdR and RcdA-dependent substrates, PdeA and TacA,  
127 respectively. These results indicate that ClpXP is activated at the CpdR adaptor  
128 level. However, ClpXP activity is not globally stimulated in  $\Delta popZ$  cells as  
129 degradation of adaptor-independent substrates, such as a degron-appended  
130 GFP, is not affected. Overexpressing PopZ also leads to enhanced degradation  
131 of CtrA, which we propose reflects a nonphysiological recognition of CtrA by  
132 ClpXP alone, as loss of the CpdR adaptor does not affect this enhancement.  
133 Together, these results support a model where PopZ-mediated localization of the  
134 protease ClpXP and its adaptors is not essential for its activation but rather PopZ  
135 may affect protein degradation principally through regulation of upstream indirect  
136 regulators of the ClpXP protease such as the CckA kinase.

137

138

## 139 **MATERIALS AND METHODS**

140 **Bacterial culture conditions and plasmid construction.** *E.coli* and  
141 *Caulobacter* strains used in the study are tabulated in Table 1. *E. coli* strains  
142 were grown in LB media at 37 °C with the appropriate antibiotic (50 µg/ml  
143 kanamycin, 15 µg/ml tetracycline, 30 µg/ml chloramphenicol). *Caulobacter*  
144 strains were grown in Peptone-Yeast-Extract (PYE) media at 30 °C with the  
145 appropriate antibiotic (1 µg/ml tetracycline, 1 µg/ml chloramphenicol, 5 µg/ml  
146 kanamycin). PdeA and PopZ was PCR amplified and cloned into pENTR  
147 plasmids. The insert was then moved into xylose-inducible expression plasmids  
148 which append an M2-epitope tag on the N-terminus of the protein using  
149 Gateway-based cloning (28). Microscopy was performed as described previously  
150 (4, 15).

151

152 ***In vivo* protein degradation assays.** *Caulobacter* cells were grown to OD<sub>600</sub> ~  
153 0.3 in PYE medium with appropriate antibiotic. Protein expression was induced  
154 with xylose wherever required and then protein synthesis was blocked by the  
155 addition of 50 µg/ml kanamycin or 30 µg/ml chloramphenicol. Equal volumes of  
156 samples were collected at different time points as indicated in figures for Western  
157 analysis.

158

159 **Western analysis.** Culture samples withdrawn at different time points were  
160 centrifuged. After removal of supernatant, the pellets were resuspended in 2X

161 SDS sample buffer containing 40 mM DTT. The samples were boiled at 95 °C for  
162 10 minutes and centrifuged to remove cellular debris. After centrifugation, the  
163 extracts were resolved on 10-12% SDS-PAGE gels. Proteins from the gel were  
164 then transferred to a polyvinylidene difluoride (PVDF) membrane. After blocking  
165 the membranes with 3% milk-TBST buffer, the membranes were probed with  
166 primary antibodies overnight at 4 °C. Antibodies used were: polyclonal rabbit  
167 anti-CtrA (1:5000 dilution), anti-DnaA (1:10000 dilution), anti-TacA (1:10000  
168 dilution), affinity purified anti-PdeA (1:1000 dilution), anti-ClpP (1:5000 dilution) or  
169 monoclonal mouse anti-FLAG M2 (1:5000 dilution; Sigma). After washing off the  
170 excess primary antibody, the membranes were probed with goat anti-rabbit  
171 (Millipore, USA) or goat anti-mouse (Millipore, USA) secondary antibodies  
172 conjugated to HRP enzyme. Proteins were visualized by the luminescence from  
173 HRP substrate using a chemiluminescence detection system G-box (Syngene,  
174 UK).

175

## 176 **RESULTS**

177 **Degradation of CtrA is enhanced in cells lacking the polar organizing**  
178 **protein PopZ.** PopZ is a scaffolding protein that facilitates polar localization of a  
179 multitude of proteins including those that are directly involved in CtrA degradation  
180 such as CpdR, RcdA, PopA and ClpX (21, 29). Cells lacking PopZ have  
181 morphological defects and fail to localize the aforementioned factors to the  
182 stalked pole (21, 29). Since polar localization of the ClpXP protease and the  
183 substrate CtrA, facilitated by the cofactors CpdR/RcdA/PopA, was postulated to



184 be critical for CtrA degradation, we hypothesized that CtrA degradation would be  
185 lost in cells lacking PopZ if this model was correct. Contrary to this hypothesis,  
186 we observed that CtrA was degraded even more rapidly in  $\Delta popZ$  than in  
187 wildtype cells (Fig. 1A and 1B). CtrA stability and cell morphology were restored  
188 to those of wildtype cells when this  $\Delta popZ$  strain was transformed with a plasmid  
189 expressing the protein PopZ, suggesting that the enhanced degradation of CtrA  
190 in  $\Delta popZ$  strain is due to specifically to loss of PopZ (Fig. 1A, 1B and 1C).  
191 Together, these results suggest that the scaffolding protein PopZ restrains CtrA  
192 degradation and support our *in vitro* work where CpdR, RcdA, PopA-cdG  
193 physically interact even in the absence of subcellular localization to stimulate  
194 ClpXP-mediated degradation of CtrA (Fig. 1D and (4)).

195

196 **Adaptor-independent ClpXP and non-ClpXP proteolysis is not affected in**  
197 **cells lacking PopZ.** The loss of PopZ protein stimulated CtrA degradation. This  
198 could be explained by prolific activation of ClpXP or proteolysis in general, or by  
199 activation of the adaptors needed to degrade CtrA *in vivo*. To address this, we  
200 monitored degradation of a ClpXP reporter substrate comprised of GFP fused to  
201 the C-terminal degron of CtrA (GFP~CtrA<sub>15</sub>) that does not require adaptors for  
202 degradation. Degradation of M2 epitope tagged GFP~CtrA<sub>15</sub> is not affected in  
203  $\Delta popZ$  cells compared to wildtype cells suggesting that the stimulation of CtrA  
204 degradation is specific to changes in adaptor activity (Fig. 2A and 2B). To  
205 examine whether protein degradation is globally stimulated in  $\Delta popZ$  cells, we  
206 monitored degradation of a ClpXP-independent substrate DnaA. Degradation of

207 DnaA was unaffected in  $\Delta popZ$  cells compared to wildtype cells suggesting that  
208 the enhancement in degradation in  $\Delta popZ$  cells is specific to ClpXP-dependent  
209 substrates (Fig. 2C and 2D). Therefore, we next set out to examine if changes in  
210 adaptor activity explained the increased CtrA degradation in  $\Delta popZ$  cells.

211

212 **Degradation of both CpdR and RcdA-dependent substrates is enhanced in**  
213 **cells lacking PopZ.** Because CtrA requires CpdR, RcdA and PopA for  
214 degradation, we explored the need for each tier of the adaptor hierarchy by using  
215 substrates specific to each level. PdeA is a phosphodiesterase that only requires  
216 the CpdR and TacA is a response regulator that requires both CpdR and RcdA  
217 for ClpXP-mediated degradation. (4, 15, 30). In order to determine which tier of  
218 adaptor-dependent proteolysis is compromised in  $\Delta popZ$  cells, we monitored the  
219 degradation of both PdeA and TacA. Degradation of both PdeA and TacA is  
220 enhanced in cells lacking PopZ suggesting that along with CtrA degradation;  
221 degradation of other adaptor-dependent ClpXP substrates is also stimulated in  
222  $\Delta popZ$  cells (Fig. 3A and 3B). These results point to a conclusion that ClpXP is  
223 constitutively activated at the CpdR adaptor level.

224

225 **CpdR is epistatic to PopZ in CtrA degradation pathway.** The adaptor CpdR is  
226 required for stimulation of CtrA degradation both *in vivo* and *in vitro* (4, 13, 14).  
227 We reasoned that since CpdR appears to be constitutively in  $\Delta popZ$  cells,  
228 deletion of CpdR in this background should result in loss of CtrA degradation. To  
229 test this hypothesis we made a  $\Delta cpdR\Delta popZ$  double knock out strain by

230 transducing  $\Delta cpdR:tet$  into the  $\Delta popZ$  strain using  $\phi Cr30$  phage. As expected,  
231 CtrA degradation was stabilized in  $\Delta cpdR\Delta popZ$  double knockout background  
232 similar to that in  $\Delta cpdR$  strain (Fig. 4A). Microscopy experiments confirmed  
233 delocalization of CpdR-YFP in the  $\Delta popZ$  and  $\Delta cpdR\Delta popZ$  cells (Fig. 4B and  
234 (21)). CtrA degradation was restored by complementing  $\Delta cpdR\Delta popZ$  strain with  
235 a plasmid expressing the CpdR protein suggesting that the loss of CtrA  
236 degradation in  $\Delta cpdR\Delta popZ$  strain could be attributed solely to loss of CpdR  
237 (Fig. 4C). CpdR activity is regulated by phosphorylation as a nonphosphorable  
238 CpdR (CpdR-D51A) prolifically delivers CtrA for degradation (13). Consistent with  
239 this, expression of CpdR-D51A in  $\Delta cpdR\Delta popZ$  strain increases CtrA  
240 degradation even more than WT (Fig. 4C). Taken together, these results suggest  
241 that the adaptor protein, CpdR, is absolutely required for CtrA degradation in  
242  $\Delta popZ$  cells.

243

244 **Overexpression of the PopZ protein stimulates CtrA degradation in a CpdR**  
245 **independent manner.** Overexpression of PopZ leads to the enlargement of the  
246 polar region and over-recruitment of proteins such as CtrA, CpdR, RcdA and  
247 ClpX to these polar zones (21). To determine if prolific polar recruitment affects  
248 substrate degradation, we monitored CtrA degradation in strains overexpression  
249 PopZ. Because we had found that loss of PopZ results in increased CtrA  
250 degradation, we were surprised to find that overproduction of PopZ also results in  
251 faster CtrA compared to wildtype cells (Fig. 5A and 5B). This stimulation was  
252 specific to CtrA; PdeA degradation was not affected (Fig. 5A and S1).

253 Overexpression of PopZ did not compromise protein degradation globally as  
254 degradation of a ClpXP-independent substrate, DnaA, remained unaffected (Fig.  
255 5A and S1).

256

257 Why is CtrA degradation stimulated upon PopZ overexpression but PdeA is not?  
258 We considered this result in light of the fact that PdeA absolutely requires CpdR  
259 for degradation both *in vivo* and *in vitro* (15, 31) while ClpXP alone can degrade  
260 purified CtrA *in vitro* (32). Our working model is that overexpression of PopZ  
261 forces ClpX and CtrA to the poles to increase local concentration sufficiently to  
262 allow for the recognition of CtrA directly by ClpXP. If this is true, then this  
263 overexpression should bypass the need for CpdR. Indeed, we found that CtrA,  
264 which is stable in  $\Delta cpdR$  cells as expected, was degraded in  $\Delta cpdR$  cells  
265 overproducing PopZ (Fig 5C and 5D). Importantly, PdeA was stable in the  
266 absence of CpdR, regardless of PopZ overexpression. Together these results  
267 suggest that forcing recruitment of the protease and the substrate by  
268 overexpressing PopZ is sufficient to bypass the need for adaptors when the  
269 substrate can be directly recognized by the protease.

270

## 271 **DISCUSSION**

272 In this work, we explored if polar localization of the ClpXP protease is critical for  
273 its activation in *Caulobacter*. Prior genetic experiments showed that the adaptors  
274 CpdR/RcdA/PopA are necessary for normal CtrA degradation *in vivo* and  
275 microscopy-based experiments showed these factors facilitated localization of

276 the ClpXP protease and the CtrA substrate to the stalked pole presumably to aid  
277 in degradation (13, 18, 19). Recent *in vitro* reconstitution experiments showed  
278 that all these accessory factors work together as biochemical adaptors  
279 enhancing the affinity of CtrA for ClpXP (4, 14). We found that CtrA is degraded  
280 more rapidly in cells lacking the PopZ protein compared to wildtype. The fact  
281 that the degradation of other CpdR and RcdA-dependent substrates is also  
282 enhanced in  $\Delta popZ$  cells supports a model where polar localization mediated by  
283 PopZ protein might be critical for restraining adaptor-mediated protein  
284 degradation rather than driving degradation.

285

286 CckA is a membrane-bound bifunctional histidine kinase. Autophosphorylation of  
287 CckA results in phosphorylation of both CtrA and CpdR via the  
288 phosphotransferase ChpT (10-12). When bound to cdG, CckA switches to a  
289 phosphatase preferring state and dephosphorylates CtrA and CpdR (16, 17).  
290 This allows cyclic fluctuation of CtrA activity via phosphorylation and proteolysis,  
291 which is key for proper cell cycle progression. Because increased local density  
292 of CckA at the stalked pole appears to drive its kinase activity (33) and PopZ is  
293 needed for CckA localization (23), a working model for our results are that loss of  
294 CckA localization forces it into a phosphatase state resulting in constitutive  
295 dephosphorylation of CpdR and resulting activation of adaptor dependent ClpXP  
296 degradation of substrates. Consistent with this, cells expressing mutant CckA  
297 alleles with disrupted polar localization result in more rapid CtrA degradation  
298 (34).

299 Our results combined with others support a model where polar localization  
300 organized by PopZ normally influences degradation of ClpXP substrates through  
301 regulating the activity of CckA rather than by forcing substrates in close proximity  
302 with proteases (Fig. 6). However, artificially increasing PopZ can force  
303 corecruitment of ClpXP with substrates to drive degradation even in the absence  
304 of adaptors. When PopZ is present at normal levels, CckA can switch between  
305 the kinase and the phosphatase states to tightly control CpdR-dependent ClpXP  
306 activation. However, when PopZ is deleted, CckA predominantly functions as a  
307 phosphatase, resulting in dephosphorylation of CpdR and constitutively activation  
308 of adaptor dependent ClpXP proteolysis. Interestingly, recent work shows that  
309 certain stresses lead to rapid clearance of CtrA through a switch in CckA to its  
310 phosphatase state without changes in CckA localization (35), further supporting  
311 the critical role in CckA activity rather than its localization per se in controlling  
312 CtrA degradation.

313

314

## 315 **ACKNOWLEDGEMENTS**

316 We thank Chien lab members for helpful discussions. K.K.J thanks Amrita  
317 Palaria for helpful comments and discussions. We also thank Christine Jacobs-  
318 Wagner for providing PopZ expression plasmids and strains and Patrick Viollier  
319 for graciously providing anti-TacA antibody. Work in the Chien lab is supported  
320 by NIH grant R01GM111706 (to P.C).

321

322

323

324 **REFERENCES**

325

326 1. **Higgins D, Dworkin J.** 2012. Recent progress in *Bacillus subtilis*  
327 sporulation. *FEMS Microbiol Rev* **36**:131-148.

328 2. **Tan IS, Weiss CA, Popham DL, Ramamurthi KS.** 2015. A Quality-  
329 Control Mechanism Removes Unfit Cells from a Population of Sporulating  
330 Bacteria. *Dev Cell* **34**:682-693.

331 3. **Domian IJ, Quon KC, Shapiro L.** 1997. Cell type-specific  
332 phosphorylation and proteolysis of a transcriptional regulator controls the  
333 G1-to-S transition in a bacterial cell cycle. *Cell* **90**:415-424.

334 4. **Joshi KK, Berge M, Radhakrishnan SK, Viollier PH, Chien P.** 2015. An  
335 Adaptor Hierarchy Regulates Proteolysis during a Bacterial Cell Cycle.  
336 *Cell* **163**:419-431.

337 5. **Curtis PD, Brun YV.** 2010. Getting in the loop: regulation of development  
338 in *Caulobacter crescentus*. *Microbiol Mol Biol Rev* **74**:13-41.

339 6. **Collier J.** 2016. Cell cycle control in Alphaproteobacteria. *Curr Opin*  
340 *Microbiol* **30**:107-113.

341 7. **Grunenfelder B, Rummel G, Vohradsky J, Roder D, Langen H, Jenal**  
342 **U.** 2001. Proteomic analysis of the bacterial cell cycle. *Proc Natl Acad Sci*  
343 *U S A* **98**:4681-4686.

344 8. **Quon KC, Yang B, Domian IJ, Shapiro L, Marczyński GT.** 1998.  
345 Negative control of bacterial DNA replication by a cell cycle regulatory  
346 protein that binds at the chromosome origin. *Proc Natl Acad Sci U S A*  
347 **95**:120-125.

348 9. **Laub MT, Chen SL, Shapiro L, McAdams HH.** 2002. Genes directly  
349 controlled by CtrA, a master regulator of the *Caulobacter* cell cycle. *Proc*  
350 *Natl Acad Sci U S A* **99**:4632-4637.

351 10. **Jacobs C, Domian IJ, Maddock JR, Shapiro L.** 1999. Cell cycle-  
352 dependent polar localization of an essential bacterial histidine kinase that  
353 controls DNA replication and cell division. *Cell* **97**:111-120.

354 11. **Jacobs C, Ausmees N, Cordwell SJ, Shapiro L, Laub MT.** 2003.  
355 Functions of the CckA histidine kinase in *Caulobacter* cell cycle control.  
356 *Mol Microbiol* **47**:1279-1290.

357 12. **Biondi EG, Reisinger SJ, Skerker JM, Arif M, Perchuk BS, Ryan KR,**  
358 **Laub MT.** 2006. Regulation of the bacterial cell cycle by an integrated  
359 genetic circuit. *Nature* **444**:899-904.

360 13. **Iniesta AA, McGrath PT, Reisenauer A, McAdams HH, Shapiro L.**  
361 2006. A phospho-signaling pathway controls the localization and activity of  
362 a protease complex critical for bacterial cell cycle progression. *Proc Natl*  
363 *Acad Sci U S A* **103**:10935-10940.

364 14. **Smith SC, Joshi KK, Zik JJ, Trinh K, Kamajaya A, Chien P, Ryan KR.**  
365 2014. Cell cycle-dependent adaptor complex for ClpXP-mediated

- 366 proteolysis directly integrates phosphorylation and second messenger  
367 signals. *Proc Natl Acad Sci U S A* **111**:14229-14234.
- 368 15. **Lau J, Hernandez-Alicea L, Vass RH, Chien P.** 2015. A  
369 Phosphosignaling Adaptor Primes the AAA+ Protease ClpXP to Drive Cell  
370 Cycle-Regulated Proteolysis. *Mol Cell* **59**:104-116.
- 371 16. **Chen YE, Tsokos CG, Biondi EG, Perchuk BS, Laub MT.** 2009.  
372 Dynamics of two Phosphorelays controlling cell cycle progression in  
373 *Caulobacter crescentus*. *J Bacteriol* **191**:7417-7429.
- 374 17. **Lori C, Ozaki S, Steiner S, Bohm R, Abel S, Dubey BN, Schirmer T,  
375 Hiller S, Jenal U.** 2015. Cyclic di-GMP acts as a cell cycle oscillator to  
376 drive chromosome replication. *Nature* **523**:236-239.
- 377 18. **McGrath PT, Iniesta AA, Ryan KR, Shapiro L, McAdams HH.** 2006. A  
378 dynamically localized protease complex and a polar specificity factor  
379 control a cell cycle master regulator. *Cell* **124**:535-547.
- 380 19. **Duerig A, Abel S, Folcher M, Nicollier M, Schwede T, Amiot N, Giese  
381 B, Jenal U.** 2009. Second messenger-mediated spatiotemporal control of  
382 protein degradation regulates bacterial cell cycle progression. *Genes Dev*  
383 **23**:93-104.
- 384 20. **Jenal U.** 2009. The role of proteolysis in the *Caulobacter crescentus* cell  
385 cycle and development. *Res Microbiol* **160**:687-695.
- 386 21. **Bowman GR, Comolli LR, Gaietta GM, Fero M, Hong SH, Jones Y, Lee  
387 JH, Downing KH, Ellisman MH, McAdams HH, Shapiro L.** 2010.  
388 *Caulobacter* PopZ forms a polar subdomain dictating sequential changes  
389 in pole composition and function. *Mol Microbiol* **76**:173-189.
- 390 22. **Bowman GR, Comolli LR, Zhu J, Eckart M, Koenig M, Downing KH,  
391 Moerner WE, Earnest T, Shapiro L.** 2008. A polymeric protein anchors  
392 the chromosomal origin/ParB complex at a bacterial cell pole. *Cell*  
393 **134**:945-955.
- 394 23. **Ebersbach G, Briegel A, Jensen GJ, Jacobs-Wagner C.** 2008. A self-  
395 associating protein critical for chromosome attachment, division, and polar  
396 organization in *caulobacter*. *Cell* **134**:956-968.
- 397 24. **Perez AM, Mann TH, Lasker K, Ahrens DG, Eckart MR, Shapiro L.**  
398 2017. A Localized Complex of Two Protein Oligomers Controls the  
399 Orientation of Cell Polarity. *MBio* **8**.
- 400 25. **Holmes JA, Follett SE, Wang H, Meadows CP, Varga K, Bowman GR.**  
401 2016. *Caulobacter* PopZ forms an intrinsically disordered hub in  
402 organizing bacterial cell poles. *Proc Natl Acad Sci U S A* **113**:12490-  
403 12495.
- 404 26. **Taylor JA, Wilbur JD, Smith SC, Ryan KR.** 2009. Mutations that alter  
405 RcdA surface residues decouple protein localization and CtrA proteolysis  
406 in *Caulobacter crescentus*. *J Mol Biol* **394**:46-60.
- 407 27. **Williams B, Bhat N, Chien P, Shapiro L.** 2014. ClpXP and ClpAP  
408 proteolytic activity on divisome substrates is differentially regulated  
409 following the *Caulobacter* asymmetric cell division. *Mol Microbiol* **93**:853-  
410 866.



- 411 28. **Skerker JM, Prasol MS, Perchuk BS, Biondi EG, Laub MT.** 2005. Two-  
412 component signal transduction pathways regulating growth and cell cycle  
413 progression in a bacterium: a system-level analysis. *PLoS Biol* **3**:e334.
- 414 29. **Ozaki S, Schalch-Moser A, Zumthor L, Manfredi P, Ebbensgaard A,**  
415 **Schirmer T, Jenal U.** 2014. Activation and polar sequestration of PopA, a  
416 c-di-GMP effector protein involved in *Caulobacter crescentus* cell cycle  
417 control. *Mol Microbiol* **94**:580-594.
- 418 30. **Abel S, Chien P, Wassmann P, Schirmer T, Kaeffer V, Laub MT, Baker**  
419 **TA, Jenal U.** 2011. Regulatory cohesion of cell cycle and cell  
420 differentiation through interlinked phosphorylation and second messenger  
421 networks. *Mol Cell* **43**:550-560.
- 422 31. **Rood KL, Clark NE, Stoddard PR, Garman SC, Chien P.** 2012. Adaptor-  
423 dependent degradation of a cell-cycle regulator uses a unique substrate  
424 architecture. *Structure* **20**:1223-1232.
- 425 32. **Chien P, Perchuk BS, Laub MT, Sauer RT, Baker TA.** 2007. Direct and  
426 adaptor-mediated substrate recognition by an essential AAA+ protease.  
427 *Proc Natl Acad Sci U S A* **104**:6590-6595.
- 428 33. **Mann TH, Seth Childers W, Blair JA, Eckart MR, Shapiro L.** 2016. A  
429 cell cycle kinase with tandem sensory PAS domains integrates cell fate  
430 cues. *Nat Commun* **7**:11454.
- 431 34. **Angelastro PS, Sliusarenko O, Jacobs-Wagner C.** 2010. Polar  
432 localization of the CckA histidine kinase and cell cycle periodicity of the  
433 essential master regulator CtrA in *Caulobacter crescentus*. *J Bacteriol*  
434 **192**:539-552.
- 435 35. **Heinrich K, Sobetzko P, Jonas K.** 2016. A Kinase-Phosphatase Switch  
436 Transduces Environmental Information into a Bacterial Cell Cycle Circuit.  
437 *PLoS Genet* **12**:e1006522.
- 438 36. **Evinger M, Agabian N.** 1977. Envelope-associated nucleoid from  
439 *Caulobacter crescentus* stalked and swarmer cells. *J Bacteriol* **132**:294-  
440 301.
- 441 37. **Thanbichler M, Iniesta AA, Shapiro L.** 2007. A comprehensive set of  
442 plasmids for vanillate- and xylose-inducible gene expression in  
443 *Caulobacter crescentus*. *Nucleic Acids Res* **35**:e137.
- 444  
445  
446  
447  
448  
449  
450  
451  
452  
453  
454  
455  
456

457 **FIGURE LEGENDS**

458

459 **Figure 1. CtrA degradation is enhanced in cells lacking the pole organizing**

460 **protein PopZ.** (A) CtrA degradation in wildtype,  $\Delta popZ$  and  $\Delta popZ$

461 complemented by a PopZ expressing plasmid (n.b., the xylose promoter is leaky

462 and PopZ is expressed even without addition of inducer). Cells were grown to

463 exponential phase in PYE and then translation was blocked by adding

464 kanamycin. CtrA stability was monitored by Western blot analyses by probing

465 the blots with anti-CtrA antibody. ClpP is shown as a loading control. (B)

466 Quantitation of Western blots. Bands corresponding to CtrA and ClpP were

467 quantified using ImageJ (NIH, USA) and normalized band intensities over time

468 are shown. Data represents mean  $\pm$  SD of two independent experiments. (C)

469 Complementation of PopZ protein expressed from a plasmid restored wildtype

470 morphology of  $\Delta popZ$  cells. All strains were grown to logarithmic phase in PYE.

471 (D) A model depicting adaptor complex-mediated proteolysis of CtrA by ClpXP.

472 Here CpdR, RcdA and PopA assemble in a hierarchical manner to deliver many

473 substrates including CtrA to ClpXP for degradation (4).

474

475 **Figure 2. Degradation of either adaptor or ClpXP-independent proteolysis is**

476 **not compromised in wildtype and  $\Delta popZ$  cells.** (A) Wildtype and  $\Delta popZ$  cells

477 expressing an M2-epitope tagged GFP~CtrA<sub>15</sub> were grown to exponential phase

478 and induced with 0.3% xylose for 2 hours. Protein synthesis was then blocked by

479 the addition of chloramphenicol. Lysates from equal volumes of cells were

480 collected at indicated time points for SDS-PAGE gels. M2-GFP~CtrA<sub>15</sub> stability

481 was monitored by Western blot analyses by probing the blots with a anti-M2  
482 antibody. ClpP is shown as a loading control. (B) Quantitation of Western blots.  
483 Bands corresponding to M2GFP~CtrA<sub>15</sub> and ClpP were quantified using ImageJ  
484 and normalized band intensities over time are shown. Data represents mean ±  
485 SD from two biological replicates. (C) Degradation of ClpXP-independent  
486 substrate DnaA is not affected in wildtype and  $\Delta popZ$  cells. Conditions used were  
487 similar as in figure 1A except that the blot was probed for anti-DnaA antibody.  
488 ClpP is shown as a loading control. (D) Quantitation of Western blots from figure  
489 2C.

490

491 **Figure 3. Degradation of CpdR and RcdA-dependent substrates is**  
492 **enhanced in cells lacking PopZ.** (A) Strains expressing M2-tagged PdeA were  
493 grown to exponential phase and induced with 0.3% xylose for 2 hours before  
494 inhibiting protein translation by the addition of chloramphenicol. (C) TacA stability  
495 was monitored in wildtype and  $\Delta popZ$  cells. Lysates from equal volume of cells  
496 were collected at indicated time points and loaded onto SDS-PAGE gels. PdeA  
497 and TacA stability was monitored by Western blot analyses by probing the blots  
498 with anti-M2 and anti-TacA antibodies. Asterisks denote cross-reacting band. (B,  
499 D) Quantitation of Western blots. Bands corresponding to M2PdeA, TacA and  
500 ClpP were quantified and normalized band intensities over time are shown. Data  
501 represents mean ± SD from two biological replicates.

502

503 **Figure 4. CpdR is epistatic to PopZ in CtrA degradation pathway.** (A) CtrA  
504 stability is monitored in wildtype,  $\Delta popZ$ ,  $\Delta cpdR$  and  $\Delta cpdR \Delta popZ$  strains. (B)  
505 Phase contrast and fluorescence microscopy images of wildtype,  $\Delta popZ$ ,  $\Delta cpdR$   
506  $\Delta popZ$  cells expressing CpdR-YFP from a plasmid bearing a CpdR promoter.  
507 Arrows indicate polar CpdR-YFP foci. (C) CtrA degradation is restored in  
508  $\Delta cpdR \Delta popZ$  double knockout cells expressing CpdR from a plasmid. CpdR and  
509 CpdR-D51A were expressed in  $\Delta cpdR \Delta popZ$  cells from low copy xylose-  
510 inducible plasmids. Cells were grown to exponential phase with 0.3% xylose or  
511 not and protein synthesis was inhibited by adding chloramphenicol. Lysates from  
512 equal number of cells were collected at indicated time points for Western  
513 analysis. Asterisks denote cross-reacting bands.

514

515 **Figure 5. Overexpression of PopZ specifically stimulated CtrA degradation**  
516 **in wildtype and  $\Delta cpdR$  cells.** (A) Degradation of CtrA, PdeA, and DnaA was  
517 monitored in wildtype cells or WT cells overexpressing PopZ from a high copy  
518 xylose-inducible plasmid. Cultures were induced for 8 hours using 0.3% xylose  
519 keeping them in exponential phase all time. After inhibiting protein synthesis by  
520 the addition of kanamycin, lysates from equal volumes of cells were collected at  
521 indicated time points and loaded onto SDS-PAGE gels. Asterisks denote cross-  
522 reacting bands. (B) Bands corresponding to CtrA and ClpP were quantified using  
523 ImageJ (NIH, USA) and normalized band intensities over time are shown. Data  
524 represents mean  $\pm$  SD of three independent experiments. (C) Degradation of  
525 CtrA, PdeA, and DnaA was monitored in  $\Delta cpdR$  cells or  $\Delta cpdR$  overexpressing

526 PopZ. (D) Bands corresponding to CtrA and ClpP were quantified and  
527 normalized intensities are shown. Data represents mean  $\pm$  SD of three  
528 independent experiments.

529

530 **Figure 6. A model representing the role of PopZ is restraining proteolysis.**

531 When PopZ is present, CckA is properly localized to stalked pole where it can  
532 switch between a kinase and a phosphatase states thus modulating  
533 phosphorylation of CpdR. When CpdR is dephosphorylated it can prime the  
534 ClpXP protease to activate degradation of substrates CtrA/TacA/PdeA. When  
535 PopZ is absent, CckA is delocalized and predominantly functions as a  
536 phosphatase (17, 34). CckA then dephosphorylates CpdR via ChpT. The  
537 dephosphorylated CpdR constitutively primed ClpXP protease and prolifically  
538 stimulates degradation of CtrA/TacA/PdeA.

539

540

541 **Supplemental information:**

542

543 **Figure S1. Quantitation of Western blots from Figure 5.** Bands corresponding  
 544 to PdeA and DnaA were quantified using ImageJ and normalized band intensities  
 545 over time are shown.

546

547 **TABLE 1. Strains and plasmids used in this study**

| Plasmid or strain          | Description                                                                                                | Source     |
|----------------------------|------------------------------------------------------------------------------------------------------------|------------|
| Strains                    |                                                                                                            |            |
| <i>E. coli</i> TOP10       | cloning strain                                                                                             | Invitrogen |
| <i>C. crescentus</i> CB15N | synchronizable derivative of wild-type<br>CB15                                                             | (36)       |
| CPC104                     | CB15N $\Delta popZ$ ( <i>spec<sup>R</sup></i> )                                                            | (23)       |
| CPC165                     | CB15N $\Delta cpdR$ ( <i>tet<sup>R</sup></i> )                                                             | (28)       |
| CPC164                     | CB15N $\Delta tacA$ ( <i>R</i> )                                                                           | (28)       |
| CPC204                     | CB15N $\Delta cpdR\Delta popZ$ ( <i>tet<sup>R</sup></i> and <i>spec<sup>R</sup></i> )                      | This study |
| CPC107                     | CB15N WT : : pJS14 -P <sub>xyIX</sub> - <i>popZ</i> ( <i>cm<sup>R</sup></i> )                              | This study |
| CPC201                     | CB15N $\Delta popZ$ : : pJS14 -P <sub>xyIX</sub> - <i>popZ</i><br>( <i>cm<sup>R</sup></i> )                | This study |
| CPC313                     | CB15N WT : : pLXM -P <sub>xyIX</sub> - <i>pdeA</i> ( <i>tet<sup>R</sup></i> )                              | This study |
| CPC314                     | CB15N $\Delta popZ$ : : pLXM -P <sub>xyIX</sub> - <i>pdeA</i><br>( <i>tet<sup>R</sup></i> )                | This study |
| CPC233                     | CB15N WT : : pcpdR- <i>cpdR-yfp</i> ( <i>kan<sup>R</sup></i> )                                             | This study |
| CPC234                     | CB15N $\Delta popZ$ : : pcpdR- <i>cpdR-yfp</i><br>( <i>kan<sup>R</sup></i> )                               | This study |
| CPC235                     | CB15N $\Delta cpdR\Delta popZ$ : : pcpdR- <i>cpdR-</i><br><i>yfp</i> ( <i>kan<sup>R</sup></i> )            | This study |
| CPC551                     | CB15N $\Delta cpdR\Delta popZ$ : : pLXM-P <sub>xyIX</sub> -<br><i>cpdR</i> ( <i>kan<sup>R</sup></i> )      | This study |
| CPC552                     | CB15N $\Delta cpdR\Delta popZ$ : : pLXM-P <sub>xyIX</sub> -<br><i>cpdR-D51A</i> ( <i>kan<sup>R</sup></i> ) | This study |
| CPC118                     | CB15N $\Delta cpdR$ : : pJS14-P <sub>xyIX</sub> - <i>popZ</i><br>( <i>cm<sup>R</sup></i> )                 | This study |
| CPC221                     | CB15N WT : : pRX- <i>gfp~ctrA<sub>15</sub></i> ( <i>kan<sup>R</sup></i> )                                  | This study |
| CPC207                     | CB15N $\Delta popZ$ : : pRX- <i>gfp~ctrA<sub>15</sub></i><br>( <i>kan<sup>R</sup></i> )                    | This study |
| Plasmids                   |                                                                                                            |            |
| pENTR/D-TOPO               | entry vector for Gateway cloning ( <i>kan<sup>R</sup></i> )                                                | Invitrogen |

|            |                                                                                                            |      |
|------------|------------------------------------------------------------------------------------------------------------|------|
| pJS14-DEST | pJS14-PxyIX-M2; high-copy, xylose inducible, N-terminus M2 tag ( <i>cm<sup>R</sup></i> )                   | (28) |
| pLXM-DEST  | pMR10-PxyIX-M2; broad host range, low-copy, xylose inducible, N-terminus M2 tag ( <i>kan<sup>R</sup></i> ) | (28) |
| pLXM-DEST  | pMR20-PxyIX-M2; broad host range, low-copy, xylose inducible, N-terminus M2 tag ( <i>tet<sup>R</sup></i> ) | (28) |
| pRX        | Replicative, xylose inducible, M2 tag ( <i>kan<sup>R</sup></i> )                                           | (37) |

Figure 1

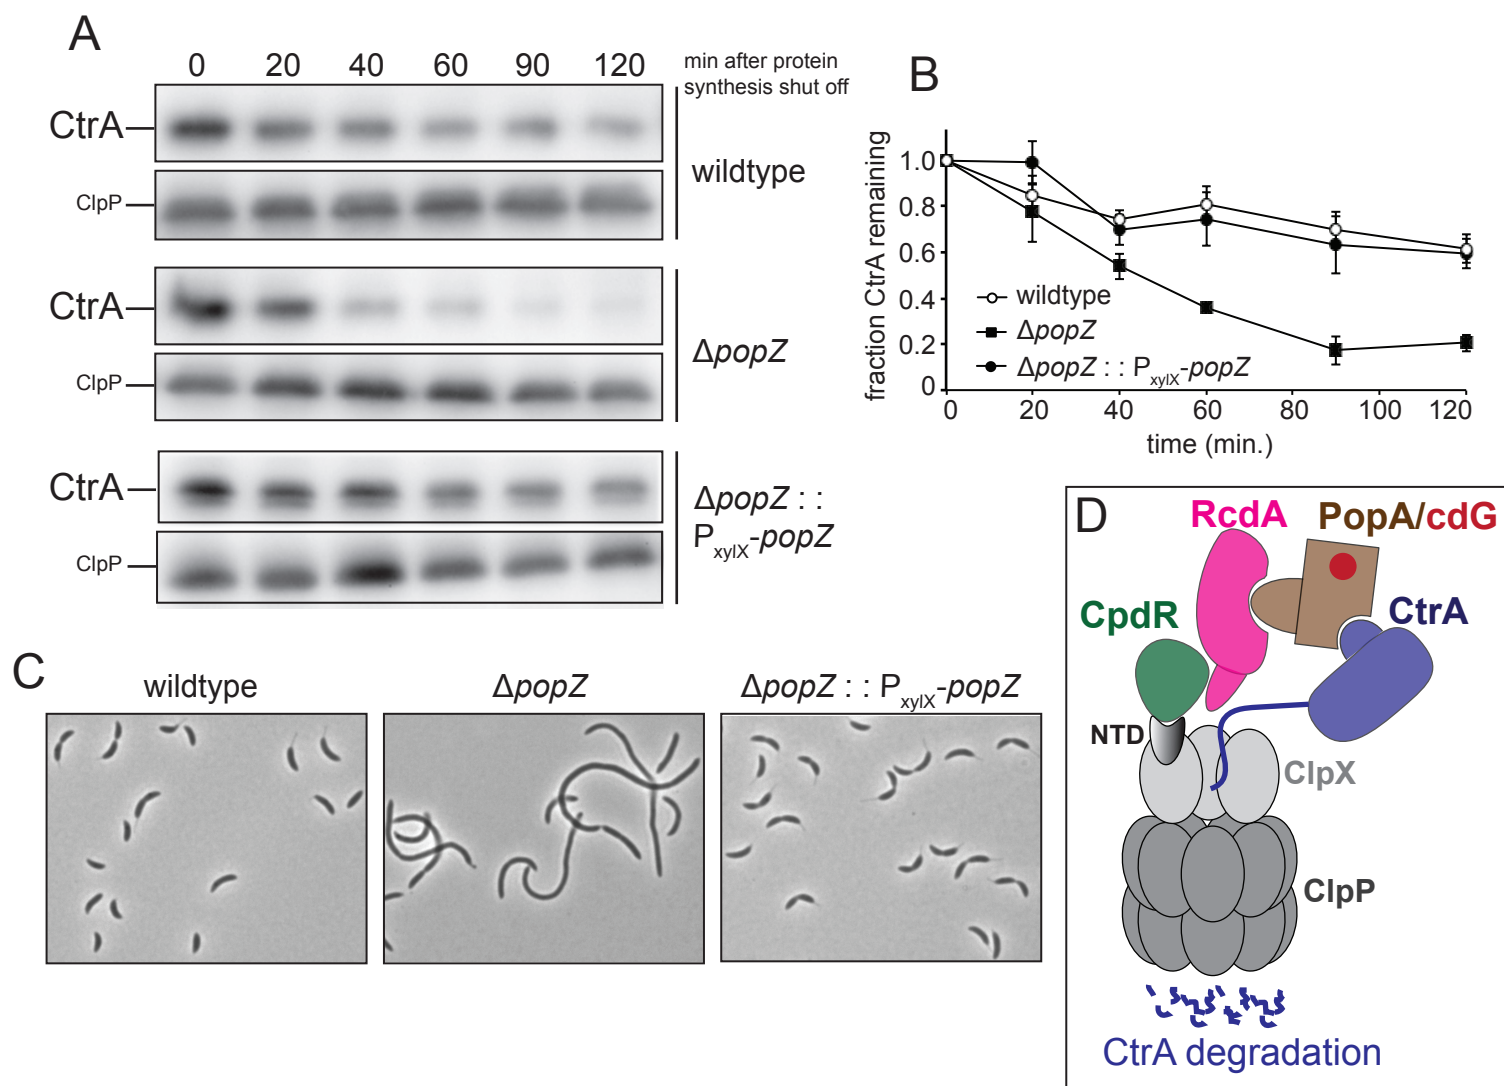



## Figure 2

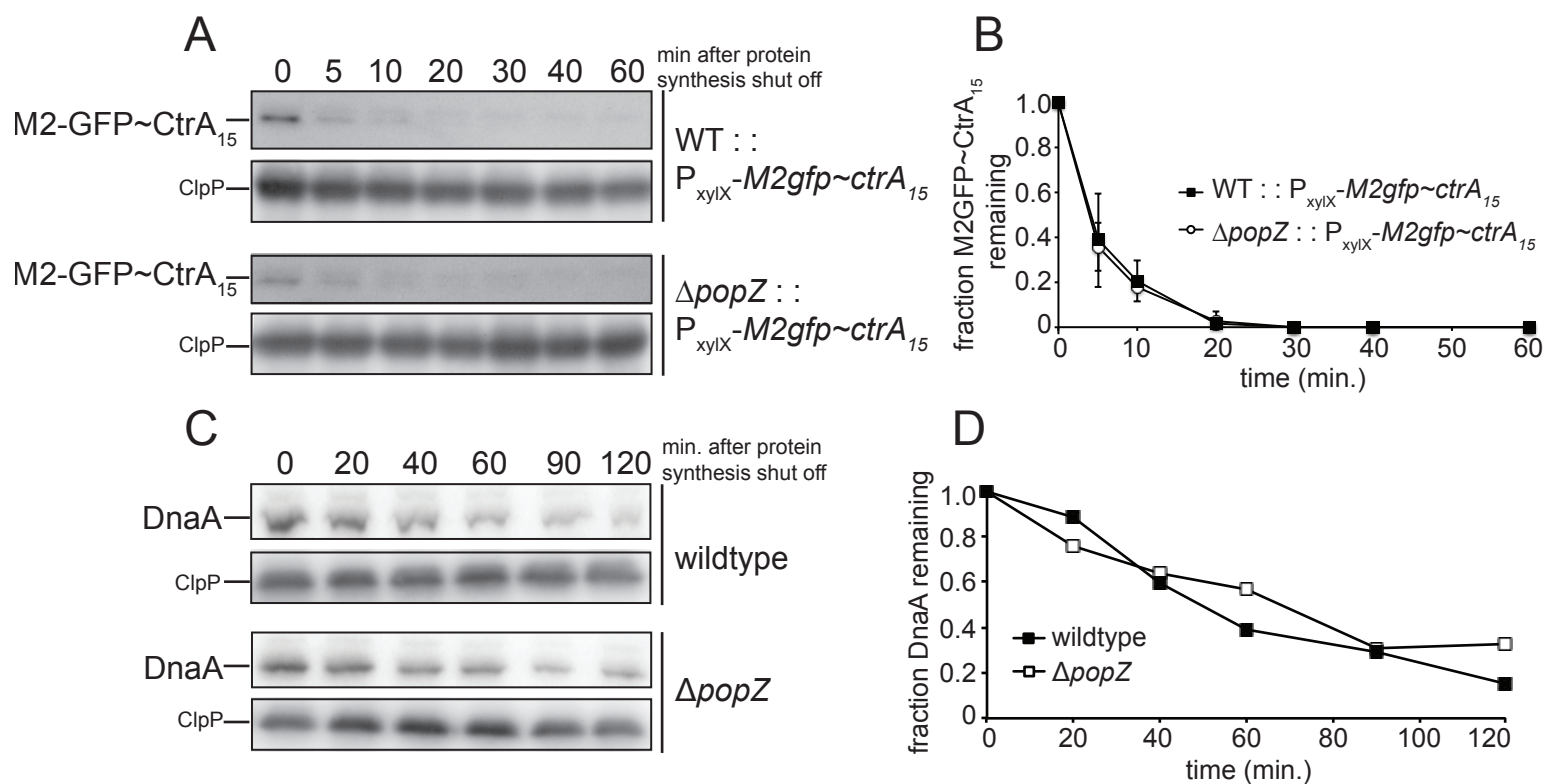

## Figure 3

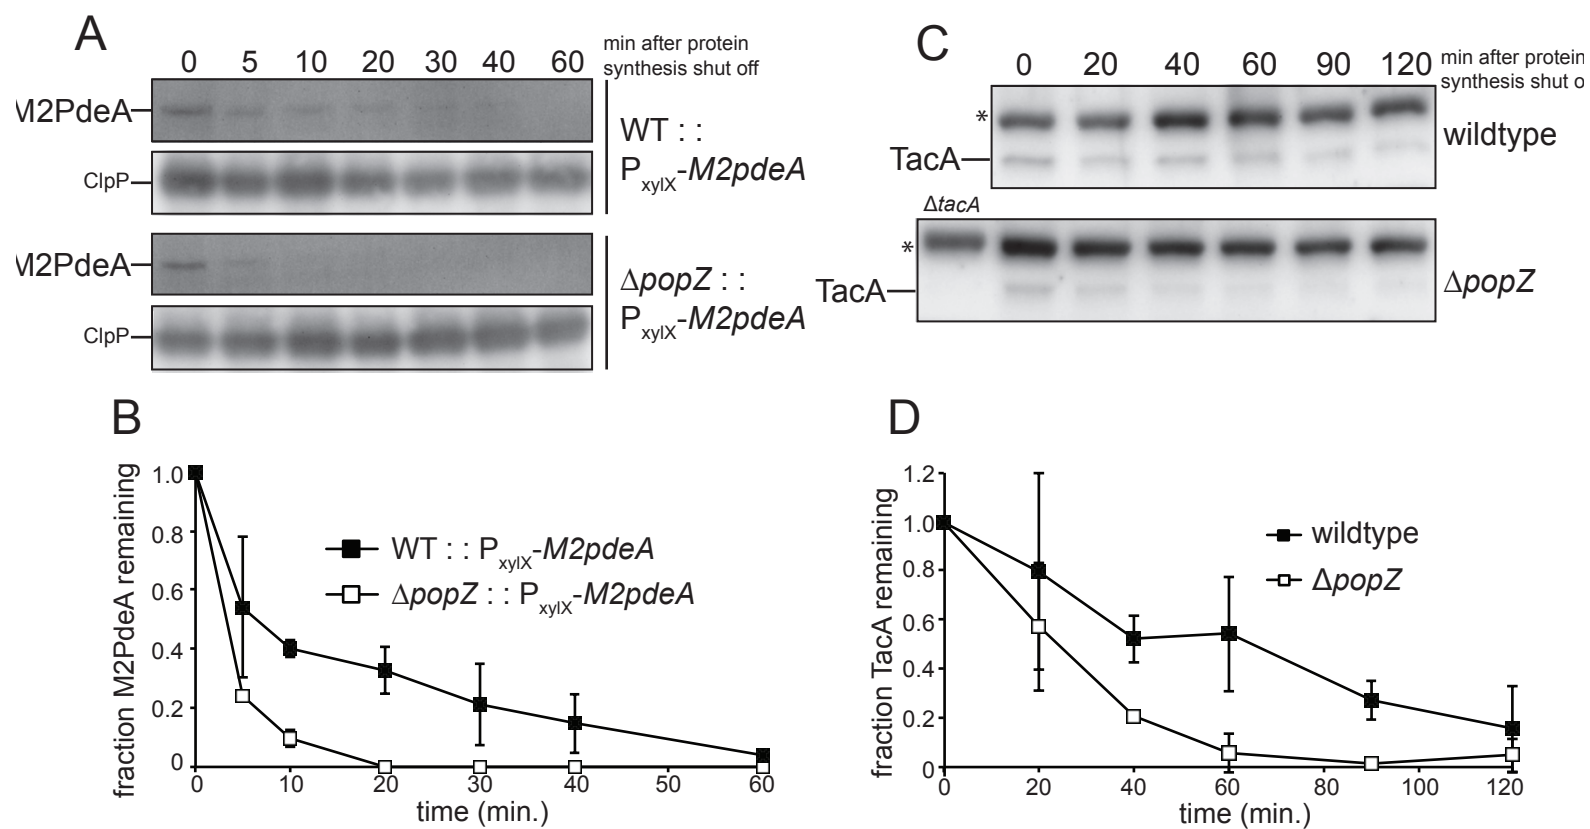

## Figure 4

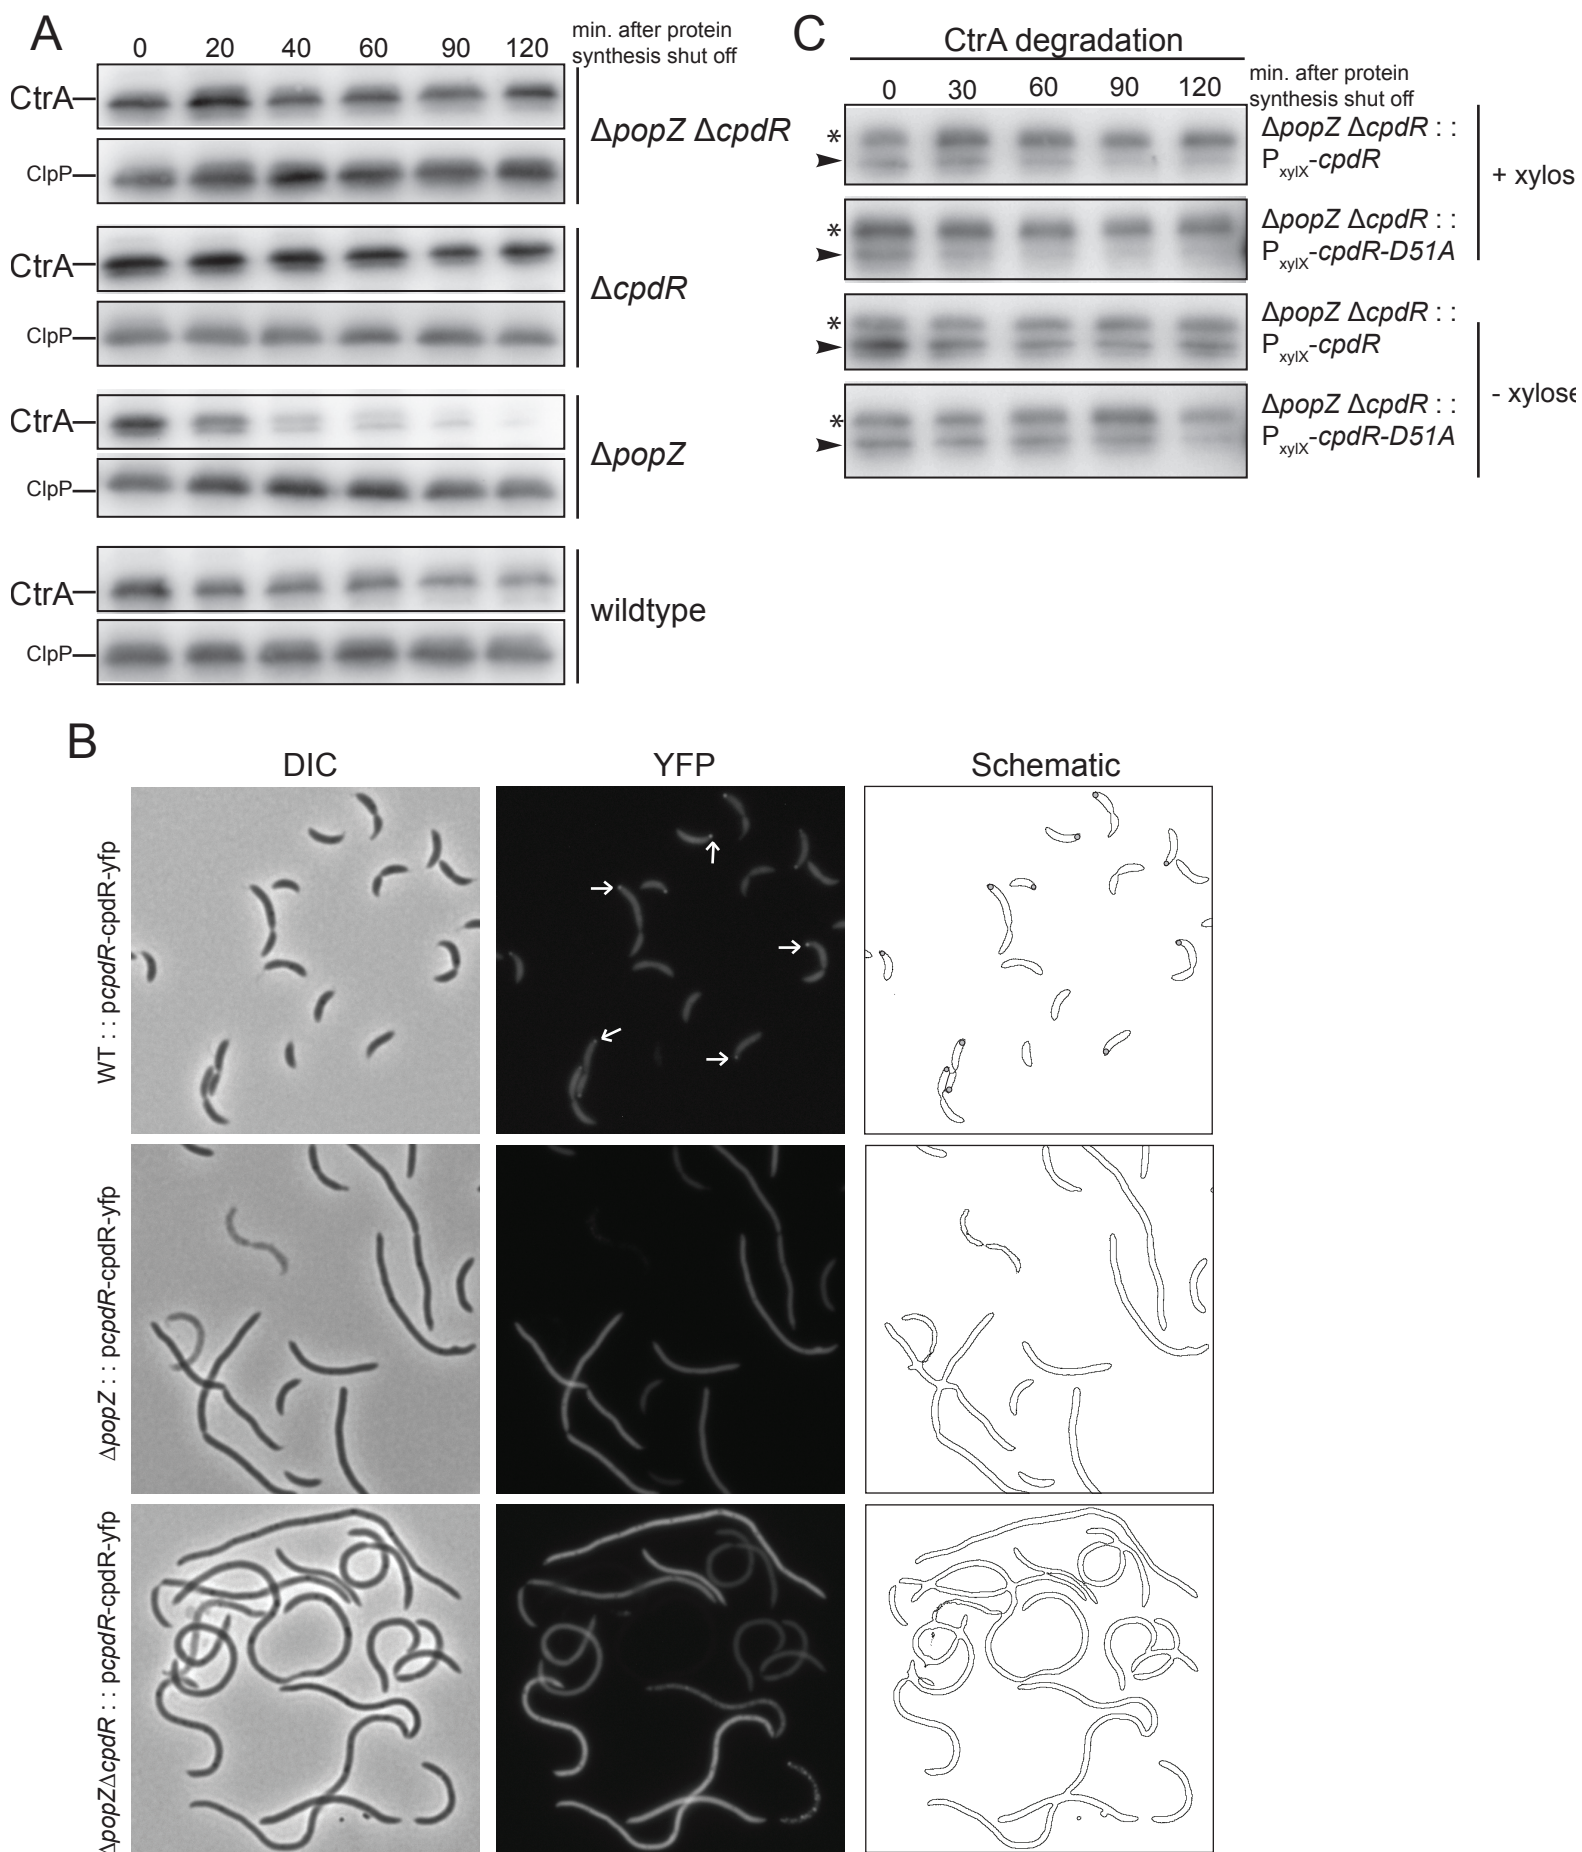

## Figure 5

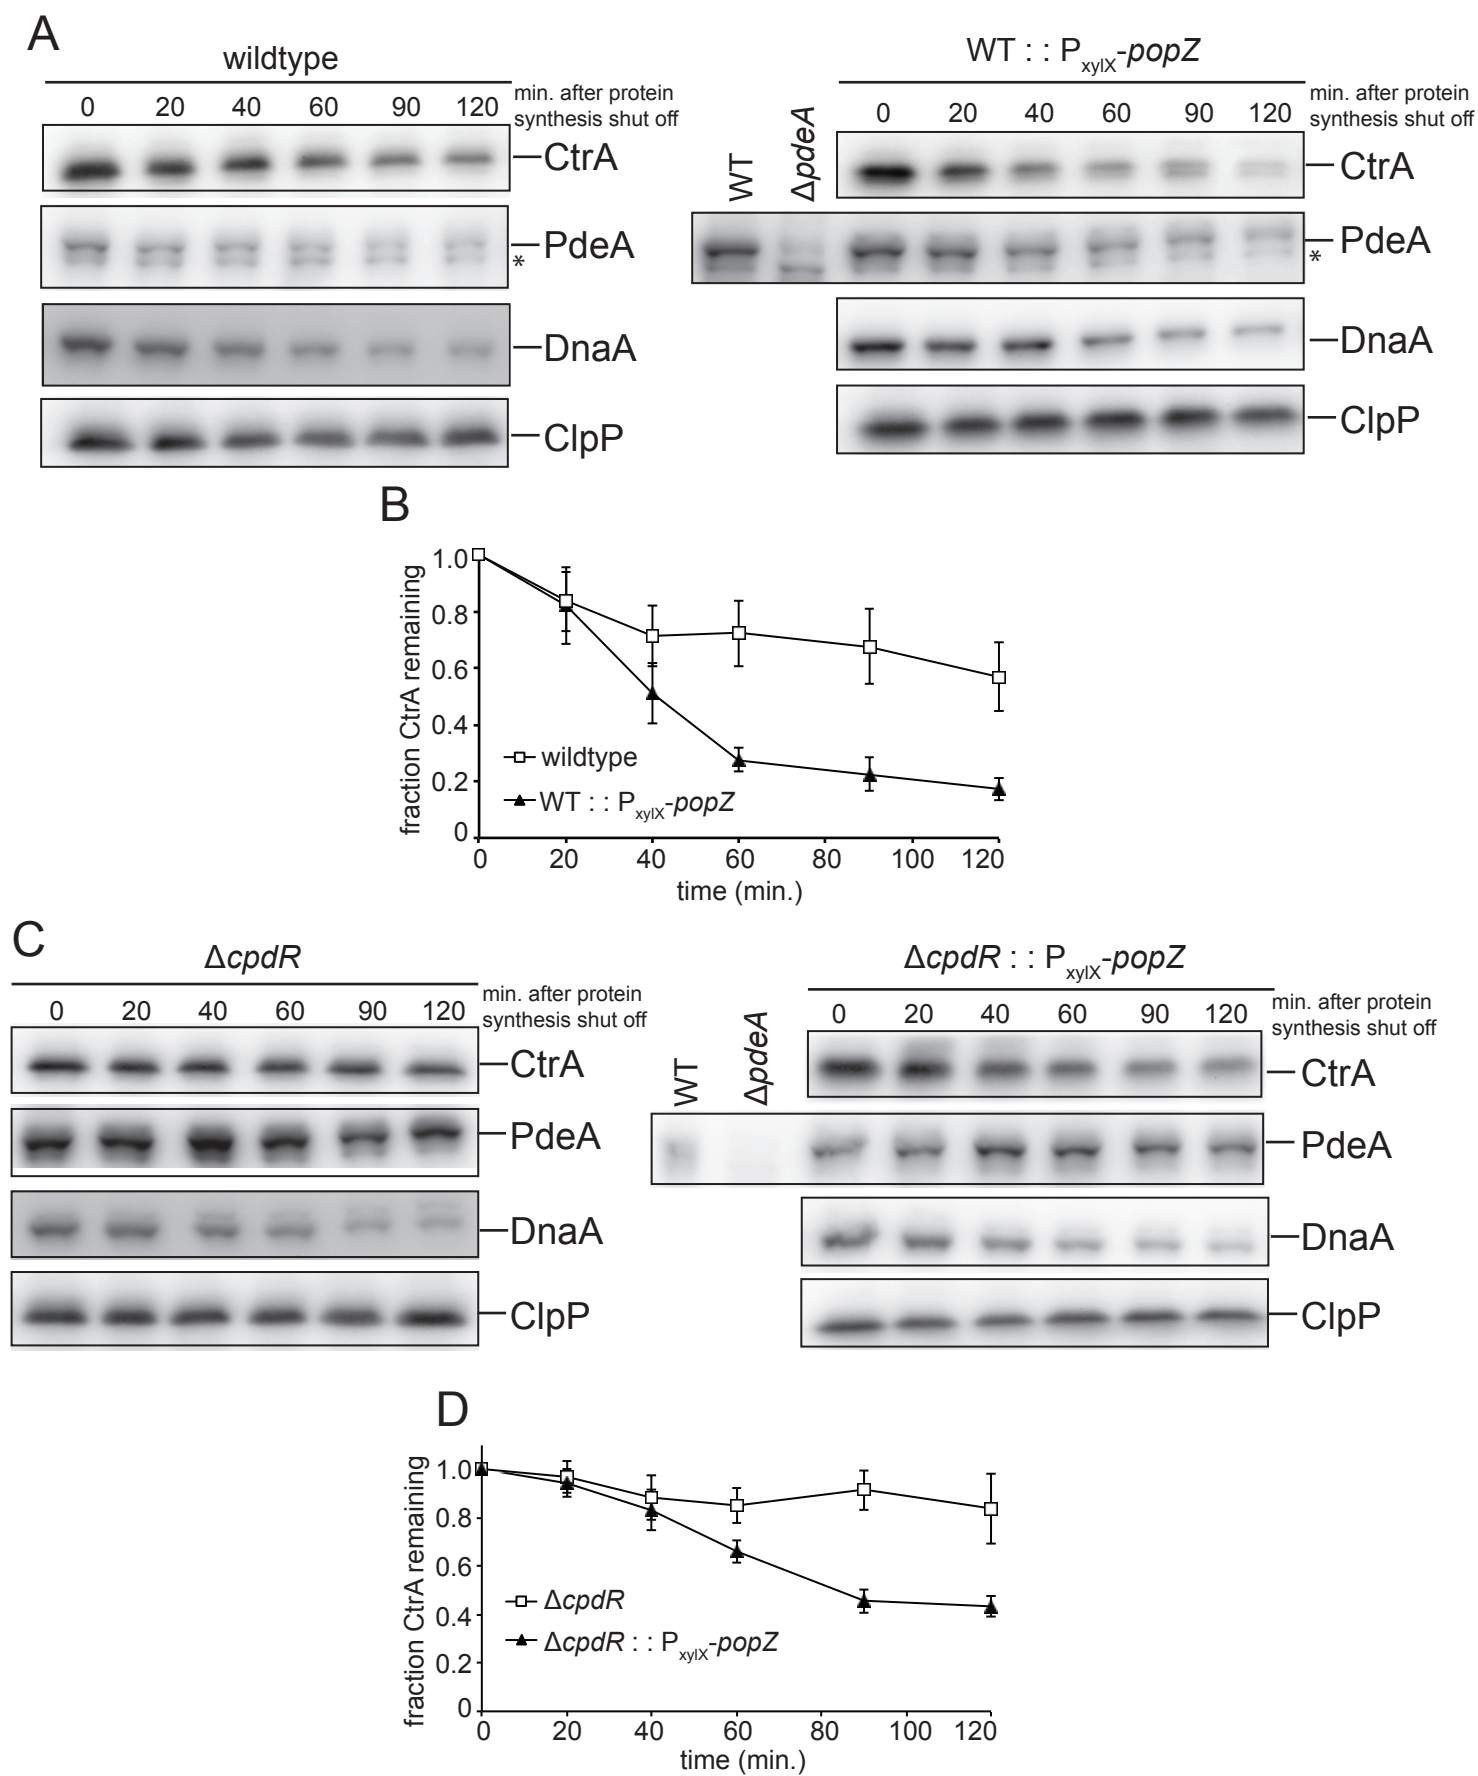

Figure 6

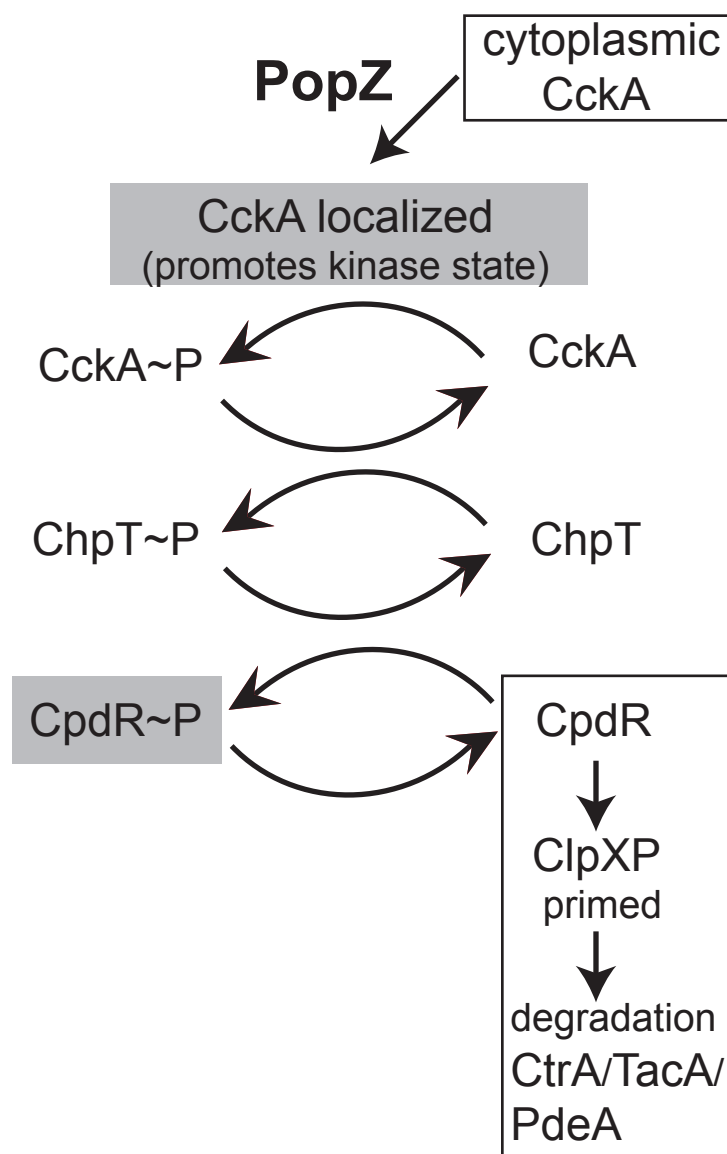

Figure S1

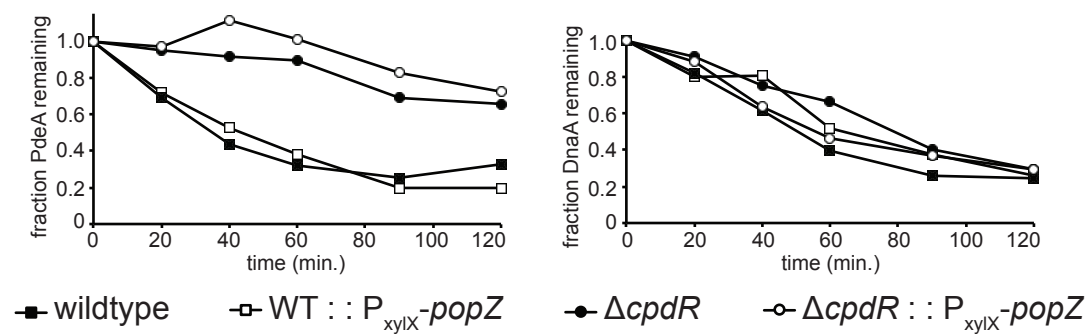

Source: http://biorxiv.org/content/10.1101/301606v1.full.pdf
